# Supplementary material
Source: publisher figshare collection journal article supplement (https://gsapubs.figshare.com/articles/dataset/_/14781936)
Supplement: Supplementary file 1 [file 1]

## Sheet: Sheet1
Kilometers north of MFT trace:	-10	-8	-6	-4	-2	0	2	4	6	8	10	12	14	16	18	20	22	24	26	28	30	32	34	36	38	40	42	44	46	48	50	52	54	56	58	60	62	64	66	68	70	72	74	76	78	80	82	84	86
1 - Western Arunachal Pradesh (DeCelles et al., 2016)
Surface elevation						0	0	0.5	0.5	0	0	0	0	0	0.5	0.5	0.5	0	0.5	1	1	1.5	2.5	2.5	2	2	2	2	2	1.5	1.5	2	2.5	2.5	2.5	2.5	2.5	2.5	2	1.5	2	2	1.5	2	1.5	2.5	2.5	2.5	3
Depth to basal décollement						0	1.5	3	4	5	5	5	5.5	5.5	5.5	5.5	6	6	6	6.5	6.5	7	8	8.5	8	8	8	9	9	9	9.5	10	10.5	11	12	13	13	13	12.5	12	12.5	12.5	12.5	14	15	16.5	17.5	17.5	18
Trace locations of major structures						trace MFT									trace Bpt	trace Tpt			trace MBT			trace BT			trace 6-7 thrust							trace ST					trace EDT									trace MCT
LH-SH total structural elevation (includes Jaishidanda Fm.)						0.5	1	1.5	1.5	0.5	0	0	0	1.5	5.5	5.5	5.5	4	7.5	16	16	16	14.5	13	16	14.5	13.5	13.5	13.5	21.5	20	18.5	17.5	16.5	16	15.5	20.5	19	19	20	20.5	20.5	20	17.5	15.5	14	13.5	12	11
Reference contact used for total structural elevation						Msm-Msu	Msm-Msu	Msm-Msu	Msm-Msu	Msm-Msu	Msm-Msu	Msm-Msu	Msm-Msu	Msm-Msu	Msm-Msu	Msm-Msu	Msm-Msu	Msm-Msu	Pg-KT	pCd-pCr	pCd-pCr	pCd-pCr	pCd-pCr	pCd-pCr	base pCbu	base pCbu	base pCbu	base pCbu	base pCbu	pCs-pCbl	pCs-pCbl	pCs-pCbl	pCs-pCbl	pCs-pCbl	pCs-pCbl	pCs-pCbl	pCs-pCbl	pCs-pCbl	pCs-pCbl	pCs-pCbl	pCs-pCbl	pCs-pCbl	pCs-pCbl	pCs-pCbl	pCs-pCbl	pCs-pCbl	pCs-pCbl	pCs-pCbl	pCs-pCbl
LH-SH preserved structural elevation (includes Jaishidanda Fm.)						0.5	1	1	1	0.5	0	0	0	0	1.5	1	5.5	4	2.5	7	9	10.5	14	13	12	14.5	13.5	13.5	13.5	15	14	18.5	17.5	16.5	16	15.5	14	13.5	13.5	14	13	13.5	13.5	13.5	13	14	13.5	12	11
2 - Sakteng, Eastern Bhutan (McQuarrie et al., 2019)
Surface elevation	0	0	0	0	0	0	0	0	0.5	0.5	0.5	1	1.5	1.5	1.5	1	1.5	1.5	1	2	2	2	1.5	2	2.5	2.5	2.5	2.5	3	3.5	4	4	4	4	3.5	3.5	3.5	3.5	3.5	3.5	3.5	2.5	2	2	2	2	2	2	2.5
Depth to basal décollement	-8	-6.5	-5	-3.5	-1.5	0	1.5	3	6	6.5	7	8	8.5	8	8	8	8.5	8.5	8.5	9.5	10	9.5	9.5	10	11.5	11.5	12	12	12.5	13.5	14	14	14	15	14.5	14.5	14.5	15.5	15.5	15	15.5	14.5	14.5	14.5	14.5	15	15	15	15.5
Trace locations of major structures						trace MFT					trace MBT												trace ST				trace MCT				trace STDS											trace STDS
LH-SH total structural elevation	8.5	8.5	8	8	7.5	5.5	4.5	3.5	2.5	1	9	15	14	13	12	11.5	10.5	10	17.5	16	14.5	17	18.5	17.5	16	15	13	12	11	10.5	10	9	8.5	8	8	8	8	8	8.5	9.5	10	10.5	11.5	13.5	14	15	16	16.5	17
Reference contact used for total structural elevation	top Ts	top Ts	top Ts	top Ts	base Ts	base Ts	base Ts	base Ts	base Ts	base Ts	top Pzm	top pCd	top pCd	top pCd	top pCd	top pCd	top pCd	top pCd	base pCs	base pCs	base pCs	base pCs	base pCs	base pCs	base pCs	base pCs	base pCs	base pCs	base pCs	base pCs	base pCs	base pCs	base pCs	base pCs	base pCs	base pCs	base pCs	top pCs	top pCs	top pCs	top pCs	top pCs	top pCs	top pCs	top pCs	top pCs	top pCs	top pCs	top pCs
LH-SH preserved structural elevation						5.5	4.5	3.5	2.5	1	7.5	11.5	15.5	12.5	12	11.5	10.5	10	16	15.5	14.5	14.5	18	17.5	16	15	13	12	11	10.5	10	9	8.5	8	8	8	8	8	8.5	9.5	10	10.5	11.5	13.5	14	15	16	16.5	17
3 - Trashigang, Eastern Bhutan (Long et al., 2011a)
Surface elevation			0	0	0	0	0	0.5	0.5	0.5	1	1.5	1.5	1	1.5	1	1.5	1.5	2	2	2.5	2.5	2	2	1	1	1.5	2.5	2.5	2	2	2.5	2.5	2	1.5	1	1.5	1.5	2	1.5	1.5	2	2.5	2	2.5	2	1.5	1.5	1.5
Depth to basal décollement			-5.5	-3.5	-2	0	1.5	3.5	5.5	6	7	7.5	7.5	7	7.5	7.5	7.5	8	9	10.5	11.5	12	11.5	12	11	11	11.5	12.5	12.5	12	12	13	13	12.5	12	11.5	12.5	12.5	14.5	15	16	17.5	18.5	18	18.5	18	18	18	18.5
Trace locations of major structures						trace MFT					trace MBT													trace ST									trace MCT
LH-SH total structural elevation			6.5	16	16	15.5	15	13	11.5	15	13.5	12	10.5	9.5	17	19	19.5	19.5	20.5	20.5	20.5	20.5	19.5	18.5	17.5	18	19	20	20.5	19	18	17	16	15	14.5	13.5	11.5	10	9.5	9.5	9.5	9.5	9.5	11.5	13	14	13	12	11
Reference contact used for total structural elevation			top Ts	top Pzg	top Pzg	top Pzg	top Pzg	top Pzg	top Pzg	top Pzd	top Pzd	top Pzd	top Pzd	top Pzd	top pCd	top pCd	top pCd	top pCd	top pCd	top pCd	top pCd	top pCd	top pCd	top pCd	top pCd	top pCd	top pCd	top pCd	top pCd	top pCd	top pCd	top pCd	top pCd	top pCd	top pCd	top pCd	top pCd	top pCd	top pCd	top pCd	top pCd	top pCd	top pCd	top pCd	top pCd	top pCd	top pCd	top pCd	top pCd
LH-SH preserved structural elevation						5.5	4.5	3	2	1	7.5	11.5	10.5	9.5	10.5	13	14	13	14	15	14	15.5	14.5	18	17	17.5	18	19.5	19.5	18.5	17.5	17	16	15	14.5	13.5	11.5	10	9.5	9.5	9.5	9.5	9.5	11.5	13	14	13	12	11
4 - Kuru Chu, Eastern Bhutan (Long et al., 2011a)
Surface elevation			0	0	0	0	0	0.5	1	1	0.5	1	1	1	0.5	0.5	0.5	0.5	1	0.5	1	0.5	1	1	1	1	1	2	1	0.5	1	1	1.5	1	1	1	1	1	1	1.5	1.5	2	2.5	2	2	2.5	2.5	1.5	1
Depth to basal décollement			-7.5	-5	-2.5	0	2.5	5	6.5	7	6.5	7	7.5	8	7.5	7.5	7.5	7.5	9.5	9	9.5	9	9.5	9.5	10	10	10	11.5	10.5	10	10.5	10.5	11	11	11	11	11	11.5	11.5	12	12.5	13	13.5	13	13	13.5	14	14	16.5
Trace locations of major structures						trace MFT					trace MBT																	trace ST												trace thr
LH-SH total structural elevation			8	8	8	6	4	18	15.5	13.5	11	17	17	17.5	17.5	18.5	19	19.5	19.5	19.5	18.5	19	20	21	23	24.5	25	25.5	25	23.5	22.5	21.5	20.5	19.5	19.5	20	20.5	21.5	23	23	23	23	23	23	23	23	23	22.5	21.5
Reference contact used for total structural elevation			top Ts	top Ts	top Ts	base Ts	base Ts	base Pzd	base Pzd	base Pzd	base Pzd	top pCd	top pCd	top pCd	top pCd	top pCd	top pCd	top pCd	top pCd	top pCd	top pCd	top pCd	top pCd	top pCd	top pCd	top pCd	top pCd	top pCd	top pCd	top pCd	top pCd	top pCd	top pCd	top pCd	top pCd	top pCd	top pCd	top pCd	top pCd	top pCd	top pCd	top pCd	top pCd	top pCd	top pCd	top pCd	top pCd	top pCd	top pCd
LH-SH preserved structural elevation						5.5	4	3	1.5	0	6.5	10	12	16	11	12.5	14	12.5	14	13	16.5	12.5	14	13	14.5	14.5	13.5	22	21	20	19	19	19	18.5	18	17.5	17	17.5	17.5	22	22	22	22	22.5	22	22	22	21	19.5
5 - Bumthang Chu, Central Bhutan (Long et al., 2011a)
Surface elevation				0	0	0	0	0.5	0.5	0.5	1	1.5	2	1.5	0.5	1	1.5	1.5	1.5	1.5	1	1	1	1	2	2	1.5	1.5	1.5	2	2	2	2	2	2.5	3	3.5	3.5	3.5	4	3.5	3.5	3.5	4	3.5	3.5	3.5	4	3.5
Depth to basal décollement				-3.5	-1.5	0	1.5	2.5	2.5	2.5	3.5	4	5	6	6	6.5	6.5	7	7	7.5	7	7	7	7.5	8.5	8.5	8	8.5	8.5	8.5	9	9	10	10	10.5	11	11.5	12	12	12.5	12.5	12.5	12.5	13	13	13	13	13.5	13.5
Trace locations of major structures						trace MFT		trace MBT												trace ST					trace MCT																			trace STDS					trace STDS
LH-SH total structural elevation				3.5	3.5	2.5	1	3	3.5	7	8	9.5	10.5	9.5	10	9.5	9	9.5	10	10.5	10	9.5	9	8.5	7.5	7	6.5	5.5	4.5	3.5	3	3	3	3	3	3	3	4.5	5	5	5	4.5	3.5	3	3	3	4	4	4
Reference contact used for total structural elevation				Tsl-Tsm	Tsl-Tsm	Tsl-Tsm	base Tsl	top Pzg	top Pzg	top pCd	top pCd	top pCd	top pCd	top pCd	top pCd	top pCd	top pCd	top pCd	top pCd	top pCd	top pCd	top pCd	top pCd	top pCd	top pCd	top pCd	top pCd	top pCd	top pCd	top pCd	top pCd	top pCd	top pCd	top pCd	top pCd	top pCd	top pCd	top pCd	top pCd	top pCd	top pCd	top pCd	top pCd	top pCd	top pCd	top pCd	top pCd	top pCd	top pCd
LH-SH preserved structural elevation						2	1	2.5	3.5	4	4.5	5	6	5	5.5	6	5.5	6	6.5	10	9.5	9	8.5	8	7.5	7	6.5	5.5	4.5	3.5	3	3	3	3	3	3	3	4.5	5	5	5	4.5	3.5	3	3	3	4	4	4
6 - Mangde Chu, Central Bhutan (Long et al., 2011a)
Surface elevation					0	0	0	0	0.5	0.5	0.5	0.5	1	1	1	1	1.5	1.5	1	1	1.5	1.5	1.5	2	2	1.5	2	2	1.5	1.5	2	2	1.5	2	2	1.5	2	1	1.5	2	2.5	2.5	3	3.5	3.5	3	2.5	3	3.5
Depth to basal décollement					-2.5	0	3	3	3	3	3.5	3.5	6	6.5	6.5	7	7.5	8	7.5	7.5	8	8	8.5	9	9	8.5	9.5	9.5	9	9	9.5	10	9.5	10.5	10.5	10	10.5	10	10	11	11.5	12	12.5	13	13	13	12.5	13	14
Trace locations of major structures						trace MFT		trace MBT								trace ST	trace MCT
LH-SH total structural elevation					4	3	1.5	5	5	7.5	8.5	9	9	9.5	9.5	7.5	7	6.5	6	5	4.5	4	3.5	3	2.5	2	1.5	1	0.5	0.5	0.5	1.5	2	2.5	2.5	3.5	4.5	5	5.5	6.5	6.5	7	7.5	8.5	9	10	9.5	10.5	11.5
Reference contact used for total structural elevation					base Ts	base Ts	base Ts	top Pzb	top Pzb	top pCd	top pCd	top pCd	top pCd	top pCd	top pCd	top pCd	top pCd	top pCd	top pCd	top pCd	top pCd	top pCd	top pCd	top pCd	top pCd	top pCd	top pCd	top pCd	top pCd	top pCd	top pCd	top pCd	top pCd	top pCd	top pCd	top pCd	top pCd	top pCd	top pCd	top pCd	top pCd	top pCd	top pCd	top pCd	top pCd	top pCd	top pCd	top pCd	top pCd
LH-SH preserved structural elevation						2.5	1.5	0	3.5	4.5	5	3.5	4.5	5.5	6	7.5	7	6.5	6	5	4.5	4	3.5	3	2.5	2	1.5	1	0.5	0.5	0.5	1.5	2	2.5	2.5	3.5	4.5	5	5.5	6.5	6.5	7	7.5	8.5	9	10	9.5	10.5	11.5
7 - Wang Chu, Western Bhutan (McQuarrie et al., 2014, Fig. 2, version B)
Surface elevation				0.5	0.5	0.5	0.5	0.5	0.5	0.5	0.5	1	1	1	1.5	1.5	1.5	1.5	1.5	1	1.5	2.5	3	3	3	3	2.5	1.5	1	1	1.5	1.5	1.5	2	2	2	1.5	1.5	2	2.5	2	2	3	2.5	3	2.5	2.5	2.5	2.5
Depth to basal décollement				-4	-2.5	0	2	4	6	7	7.5	8	8.5	8.5	9	9	8.5	9.5	11	10.5	11.5	12	13	13	13	13	12.5	12.5	12	12	12.5	13	13	14	13.5	14	13.5	13.5	14.5	15	14.5	14.5	16	16	16.5	16	16.5	16.5	16.5
Trace locations of major structures						trace MFT					trace MBT			trace ST				trace MCT										trace GH/Paro thrust				trace GH/Paro thrust																	trace GH/Paro thrust
LH total structural elevation (includes Paro Fm.)				5.5	5.5	6	5	4	1.5	1.5	8	8	14.5	13	12	11.5	10.5	7.5	5.5	4.5	4.5	5	5	5	5.5	7	10	12	11.5	12.5	12	12.5	13.5	14.5	15.5	16	16.5	15.5	17.5	18.5	19	20	19	18.5	17.5	17.5	16.5	16	14.5
Reference contact used for total structural elevation				top Ts	top Ts	base Ts	base Ts	base Ts	base Ts	base Ts	base Pzm	base Pzm	base pCs	base pCs	base pCs	base pCs	base pCs	base pCs	base pCs	base pCs	base pCs	base pCs	base pCs	base pCs	base pCs	base pCs	base pCs	base pCs	base pCs	top pCd	top pCd	top pCd	top pCd	top pCd	top pCd	top pCd	top pCd	top pCd	top pCd	top pCd	top pCd	top pCd	top pCd	top pCd	top pCd	top pCd	top pCd	top pCd	top pCd
LH preserved structural elevation (includes Paro Fm.)						6	5	4	2.5	1.5	8	8	8.5	13	12	11.5	10.5	7.5	5.5	4.5	4.5	5	5	5	5	6	9.5	12	11.5	12.5	12	12.5	12	13	13	13.5	13	12.5	14	14.5	14	14.5	15	15	15	15	15	15.5	14.5
8 - Eastern Sikkim (Parui and Bhattacharyya, 2018)
Surface elevation					0.5	0.5	0.5	0.5	0.5	1	1	2	1.5	1	0.5	1	0.5	1.5	2	0.5	0	0	0.5	1	0.5	0	0.5	1	1	1	1.5	1	0	0	0.5	0.5	1	1	1	0	0	0	1	2	3	2.5	2	2	1.5
Depth to basal décollement						0	1.5	2.5	3.5	5	6	8	7.5	7	7	7.5	8	8.5	9	8	8	8	8.5	9	8.5	8.5	9	9.5	10	10	10.5	10.5	9.5	9.5	10	10.5	11	11.5	11.5	11	10.5	11	12	13	15	15.5	15	14.5	14.5
Trace locations of major structures						trace MFT			trace MBT, RT1		trace PT												trace Rabangla thrust										trace Martam thrust					trace PT			trace MCT
LH-SH full structural elevation						0.5	1	1.5	9.5	8.5	17	16	15	14.5	14.5	15.5	18	19.5	20	21	22.5	24	25	25	25	22.5	20	20	21.5	23	24.5	24.5	24	24	24	24	23	21.5	20	18.5	16.5	14	12.5	11	9.5	8.5	8.5	8.5	8.5
Reference contact used for total structural elevation						top Ts	mid Ts	mid Ts	top Daling	top Paro	top Paro	top Paro	top Paro	top Paro	top Paro	top Paro	top Paro	top Paro	top Paro	top Paro	top Paro	top Paro	top Paro	top Paro	top Paro	top Paro	top Paro	top Paro	top Paro	top Paro	top Paro	top Paro	top Paro	top Paro	top Paro	top Paro	top Paro	top Paro	top Paro	top Paro	top Paro	top Paro	top Paro	top Paro	top Paro	top Paro	top Paro	top Paro	top Paro
LH-SH preserved structural elevation						0.5	1	1.5	9.5	8.5	16.5	16	15	14.5	14.5	15	16.5	10	11	11	11.5	11	13.5	12.5	10.5	10.5	11	11.5	11.5	12	12	11.5	15.5	15.5	15	14	13	20.5	19.5	18	16.5	14	12.5	11	9.5	8.5	8.5	8.5	8.5
9 - Western Sikkim (Bhattacharyya et al., 2015)
Surface elevation (stopped at 98 km after reviewer recommendation)					0.5	1	1.5	1.5	1.5	2	2	2	2	2.5	2	1.5	2	1.5	1.5	1	1	1.5	1.5	2	2	2.5	2	2.5	2.5	2.5	4	4.5	3.5	3	4	5	5	5	6	6	5.5	5	5	5	5	5	5	5.5	5.5
Depth to basal décollement (stopped at 98 km after reviewer recommendation)						0	2.5	4	5.5	7	7.5	8	8	9	9	8.5	9	8.5	8.5	8.5	8.5	9.5	11	11	11.5	12	12	12.5	12.5	12.5	14.5	14.5	14	13.5	15	16	16.5	16.5	17	17.5	17	17	17	17	17	17	17.5	17.5	18
Trace locations of major structures						trace MFT		trace MBT	trace Ramgarh thrust	trace Pelling thrust		trace PTi		Darjeeling GH klippe					trace Ramgarh thrust							trace RT			trace Rabangla thrust		trace Martam thrust							trace MCT
LH total structural elevation						1	1.5	7.5	9.5	14	13	14.5	13.5	12.5	12	12.5	16	18.5	20	20.5	21.5	22	22	22.5	23	23	23	23	23.5	23.5	23.5	23	22.5	22	21	20	19	18	17	16	14.5	13.5	12.5	11	10	8.5	8	8	7.5
Reference contact used for total structural elevation						mid Ts	mid Ts	top Gondwana	top Daling	top Paro	top Paro	top Paro	top Paro	top Paro	top Paro	top Paro	top Paro	top Paro	top Paro	top Paro	top Paro	top Paro	top Paro	top Paro	top Paro	top Paro	top Paro	top Paro	top Paro	top Paro	top Paro	top Paro	top Paro	top Paro	top Paro	top Paro	top Paro	top Paro	top Paro	top Paro	top Paro	top Paro	top Paro	top Paro	top Paro	top Paro	top Paro	top Paro	top Paro
LH preserved structural elevation						0.5	1	6.5	8.5	13.5	13	14.5	13.5	12.5	12	12.5	13.5	14.5	9	9.5	8.5	8.5	9	9.5	10	14.5	13.5	12.5	13.5	12.5	15.5	14.5	13.5	12.5	20.5	20	19	18	17	16	14.5	13.5	12.5	11	10	8.5	8	8	7.5
10 - Tamor Khola, Eastern Nepal (Schelling and Arita, 1991)
Surface elevation					0	0	0.5	0.5	0.5	0.5	0.5	0.5	0	0.5	0.5	0.5	1	1	1	1.5	1.5	1.5	1	1.5	1	1	1	0.5	0.5	0.5	0.5	1	1	1	0.5	0.5	0.5	0.5	0.5	1	1	0.5	0.5	1	1.5	1.5	1	1	1
Depth to basal décollement					-3	0	3.5	4.5	5.5	6	6	6	6	6.5	6.5	6.5	7	7	7.5	7.5	8	8.5	8.5	9.5	10	10.5	10.5	10.5	10.5	10.5	11	11	12	11.5	11.5	11.5	12	13.5	15	16	19	20	21	22.5	23	23	23	23	23
Trace locations of major structures						trace MFT				trace DT		trace MBT	trace MCT														trace TKT, MCT																				trace MCT
LH-SH full structural elevation					4	5	7	7	6.5	6	4	9	5.5	3.5	2.5	2.5	2	2	2	2.5	3	2.5	2	1.5	1	0.5	11	12.5	14.5	16	17	18	19.5	20.5	20.5	20	20	19.5	18	18	17	16	15	14	12.5	11	9	7.5	6.5
Reference contact used for total structural elevation					mid Siw	mid Siw	mid Siw	mid Siw	base Siw	base Siw	base Siw	top LH	top LH	top LH	top LH	top LH	top LH	top LH	top LH	top LH	top LH	top LH	top LH	top LH	top LH	top LH	base upper LH metaseds unit	base upper LH metaseds unit	base upper LH metaseds unit	base upper LH metaseds unit	base upper LH metaseds unit	base upper LH metaseds unit	base upper LH metaseds unit	base upper LH metaseds unit	base upper LH metaseds unit	base upper LH metaseds unit	base upper LH metaseds unit	base upper LH metaseds unit	base of LH metaseds	base of LH metaseds	base of LH metaseds	base of LH metaseds	base of LH metaseds	base of LH metaseds	base of LH metaseds	base of LH metaseds	base of LH metaseds	base of LH metaseds	base of LH metaseds
LH-SH preserved structural elevation						4	3	2	0.5	6	4	7.5	5.5	3.5	2.5	2.5	2	2	2	2.5	3	2.5	2	1.5	1	0.5	11	12.5	13.5	15	16.5	17	18.5	19.5	19.5	19.5	19.5	19	18	18	17	16	15	14	12.5	11	9	7.5	6.5
11 - Ramechap, Eastern Nepal (Schelling, 1992)
Surface elevation						0.5	0.5	0.5	0.5	0.5	0.5	0.5	0.5	1	0.5	0.5	0.5	0.5	1	1.5	1.5	1	1	1	1	1.5	1.5	1	1	1	0.5	0.5	0.5	0.5	0.5	1	1.5	1.5	1.5	1.5	1.5	2	2	2	2	2.5	3	3.5	4
Depth to basal décollement						0	2.5	4	5	5.5	6	6	6	6.5	6.5	6.5	6.5	6.5	7	7.5	7.5	7.5	7	7	7.5	8	8.5	8	7.5	7.5	7.5	7.5	7.5	8.5	9.5	10	10.5	10.5	10.5	11	11	11.5	12	12	12	12	13	13.5	14
Trace locations of major structures						trace MFT							trace KT	trace thrust				trace MT	trace BT	trace MCT						trace MCT, SKT																					trace MCT
LH-SH total structural elevation						1.5	1.5	1	4.5	4.5	5	6	6	4.5	3	2	6.5	6	8.5	4.5	3.5	2.5	2.5	3.5	17.5	18.5	17.5	16.5	15.5	14.5	13.5	13	13	13	12	11.5	11.5	11.5	11.5	11.5	12	12	12	12.5	13.5	14	14.5	15	15
Reference contact used for total structural elevation						mid Ts	mid Ts	mid Ts	mid Ts	mid Ts	mid Ts	mid Ts	base Ts	base Ts	base Ts	base Ts	base Ts	base Ts	top LH metaseds	top LH metaseds	top LH metaseds	top LH metaseds	top LH metaseds	top LH metaseds	top LH metaseds	top LH metaseds	top LH metaseds	top LH metaseds	top LH metaseds	top LH metaseds	top LH metaseds	top LH metaseds	top LH metaseds	lower LH metaseds	lower LH metaseds	lower LH metaseds	lower LH metaseds	lower LH metaseds	lower LH metaseds	lower LH metaseds	lower LH metaseds	lower LH metaseds	lower LH metaseds	lower LH metaseds	lower LH metaseds	lower LH metaseds	lower LH metaseds	lower LH metaseds	lower LH metaseds
LH-SH preserved structural elevation						1.5	1.5	0.5	2	1.5	1	1	0.5	4.5	3	2	0	6	8.5	4.5	3.5	2.5	2.5	3.5	5.5	16.5	17	16	14.5	13.5	13	13	13	13	12	11.5	11.5	11.5	11.5	11.5	12	12	12	12.5	13.5	14	14.5	15	15
12 - Budhi Gandaki, Central Nepal (Khanal and Robinson, 2013)
Surface elevation				0	0	0	0	0.5	0.5	1	1	0.5	0.5	0.5	0.5	0.5	1	1	1	1	1.5	1.5	2	2	2	1.5	1	1.5	1.5	1.5	1	1	1.5	1.5	1.5	1.5	2	1.5	1.5	2	1.5	1.5	1.5	1.5	1.5	1.5	2	2.5	2
Depth to basal décollement				-3	-1.5	0	1	2.5	3.5	4.5	5	5.5	6.5	7	7.5	7.5	8	8.5	8.5	9	9.5	10	10.5	11	11	11	10.5	11	11	11.5	11	12	14	15.5	17	18	20	20	20	20.5	20.5	20.5	21	21	21	21	21.5	22.5	22
Trace locations of major structures						trace MFT									trace MDT				trace MBT			trace RT, MCT									trace RT, MCT
LH-SH total structural elevation				3.5	3.5	3.5	3.5	3.5	3	3	3	3	4	5	6	6.5	5	3	15	16.5	16	15.5	15	13.5	12.5	12.5	12.5	12.5	12.5	15	20.5	22	23	23.5	24	23.5	23	24	25	26	26	25.5	25	25.5	26	26.5	27.5	28	28.5
Reference contact used for total structural elevation				top Siw	top Siw	mid Siw	mid Siw	mid Siw	mid Siw	mid Siw	mid Siw	mid Siw	mid Siw	mid Siw	mid Siw	mid Siw	mid Siw	mid Siw	top Robang/top Kuncha	top Robang/top Kuncha	top Robang/top Kuncha	top Robang/top Kuncha	top Robang/top Kuncha	top Robang/top Kuncha	top Robang/top Kuncha	top Robang/top Kuncha	top Robang/top Kuncha	top Robang/top Kuncha	top Robang/top Kuncha	top Robang/top Kuncha	top Robang/top Kuncha	top Robang/top Kuncha	top Robang/top Kuncha	top Robang/top Kuncha	top Robang/top Kuncha	top Robang/top Kuncha	top Robang/top Kuncha	top Robang/top Kuncha	top Robang/top Kuncha	top Robang/top Kuncha	top Robang/top Kuncha	top Robang/top Kuncha	top Robang/top Kuncha	top Robang/top Kuncha	top Robang/top Kuncha	top Robang/top Kuncha	top Robang/top Kuncha	top Robang/top Kuncha	top Robang/top Kuncha
LH-SH preserved structural elevation						3.5	3.5	3.5	3	3	3	3	2.5	1.5	5.5	6.5	5	3	11	12	11	15.5	15	13.5	12.5	12.5	12.5	12.5	12.5	15	12.5	15	17	18.5	18.5	18	18	18.5	19	20	20.5	20.5	20.5	20.5	20.5	20.5	21	21	21.5
13 - Marsyangdi, Central Nepal (Khanal, 2014)
Surface elevation					0	0	0	0	0	0	0.5	0.5	0	0.5	0	0	0	0	0	0	0	0	0	0	0	0	0	0	0.5	0.5	0.5	1	0.5	0.5	1	0.5	0.5	0.5	0.5	0.5	0.5	0.5	0.5	0.5	0.5	0.5	0.5	1	1
Depth to basal décollement					-2	0	1.5	3	4.5	5.5	5.5	5.5	5.5	6	5.5	5.5	5.5	5.5	5.5	5.5	5.5	5.5	6	6	6	6	6	6	6.5	6.5	6.5	7	7	7	7	6.5	6.5	7	7	7	7	7	7	7	7	7.5	7.5	8.5	9.5
Trace locations of major structures						trace MFT							trace thrust																		trace MBT
LH-SH total structural elevation					3.5	4	3.5	2.5	1.5	0.5	1.5	3	4.5	4	3	1.5	0	0	0.5	1	1	1	1	1	0.5	0.5	0.5	1.5	2	1.5	8.5	9.5	9	8.5	8.5	7.5	15.5	16.5	16.5	16.5	16.5	16	16.5	17.5	18.5	19	19.5	20.5	20.5
Reference contact used for total structural elevation					top Siw	top Siw	base Siw	base Siw	base Siw	base Siw	base Siw	base Siw	base Siw	base Siw	base Siw	base Siw	base Siw	base Siw	mid Siw	mid Siw	mid Siw	mid Siw	mid Siw	mid Siw	mid Siw	mid Siw	mid Siw	mid Siw	mid Siw	mid Siw	top Malekhu	top Malekhu	top Malekhu	top Malekhu	top Malekhu	top Malekhu	base Robang/base Kuncha	base Robang/base Kuncha	base Robang/base Kuncha	base Robang/base Kuncha	base Robang/base Kuncha	base Robang/base Kuncha	base Robang/base Kuncha	base Robang/base Kuncha	base Robang/base Kuncha	base Robang/base Kuncha	base Robang/base Kuncha	base Robang/base Kuncha	base Robang/base Kuncha
LH-SH preserved structural elevation						4	3.5	2.5	1.5	0.5	0	0	4	4	3	1.5	0	0	0.5	1	1	1	1	0.5	0.5	0.5	0	0	1.5	1.5	8.5	9	9	8.5	8.5	7.5	8.5	7	7	7	7	9	9	10.5	12	12.5	13	13.5	14
14 - Kaligandaki, Central Nepal (Robinson and Martin, 2014, cross section 1)
Surface elevation				0	0	0	0	0.5	1	0.5	1	1	1	1	0.5	0.5	1	1.5	1	0.5	0.5	0.5	1	1.5	1.5	1	1.5	1	1	1	1	1.5	2	2	1.5	1.5	1	1.5	1	1.5	1.5	1.5	1	1	1.5	2	2.5	2.5	2.5
Depth to basal décollement				-2	-1	0	1	2.5	4	5	6.5	6.5	6.5	6.5	6.5	6.5	7	7.5	7	6.5	7	7	7.5	8	8	8	8.5	8	8.5	10	11.5	13.5	15.5	16.5	16	16	16	17	16.5	17	17	17.5	17.5	17.5	18	19	19.5	19.5	19.5
Trace locations of major structures						trace MFT						trace MBT																																				normal fault	trailing end RT
LH-SH full structural elevation				2.5	3.5	4	4.5	3.5	7	6.5	5.5	7.5	7	17.5	18	18	17	17	17	16	14.5	16	17	18	19	20	21	17	18	18.5	19.5	20.5	21.5	21.5	21.5	23	23.5	24	24	23	23.5	23.5	24	25	25.5	26.5	26.5	23.5	24
Reference contact used for total structural elevation				upper Siw	upper Siw	upper Siw	upper Siw	upper Siw	base Siwaliks	base Siwaliks	base Siwaliks	top Malekhu	top Malekhu	top Malekhu	top Malekhu	top Malekhu	top Malekhu	top Malekhu	top Malekhu	top Malekhu	top Malekhu	top Malekhu	top Malekhu	top Malekhu	top Malekhu	top Malekhu	top Malekhu	base Kuncha	base Kuncha	base Kuncha	base Kuncha	base Kuncha	base Kuncha	base Kuncha	base Kuncha	base Kuncha	base Kuncha	base Kuncha	base Kuncha	base Kuncha	base Kuncha	base Kuncha	base Kuncha	base Kuncha	base Kuncha	base Kuncha	base Kuncha	base Kuncha	top Kuncha
LH-SH preserved structural elevation						4	4.5	3.5	2.5	1.5	5	7	7	8.5	6.5	6.5	7	7.5	9	8.5	10	11	11.5	10.5	11.5	11	12	12	10	11	11	12.5	13.5	13	13	13.5	15	15.5	15	15	15.5	15.5	15.5	15.5	17	17.5	18.5	18.5	15.5
15 - Simikot, Western Nepal (Robinson et al., 2006)
Surface elevation		0	0	0.5	0.5	0.5	1	1	0.5	0.5	0.5	1	1.5	1.5	1	0.5	0.5	0.5	0.5	0.5	1	1.5	1.5	2	2	2.5	2	1.5	1	1	1	1.5	1	1	1	1	0.5	0.5	0.5	1.5	1.5	2	2.5	3	3	2.5	2	1	2
Depth to basal décollement		-5	-3.5	-2.5	-1	0	1.5	3	4	5	6	7.5	8.5	8.5	8	7.5	8	8.5	8.5	8.5	9	9.5	9.5	10.5	11	11	10.5	10.5	10	9.5	10	10.5	10.5	10.5	10.5	11	10.5	10.5	10.5	11.5	12	12	12.5	13.5	13.5	13	12.5	12	12.5
Trace locations of major structures						trace MFT							trace thrust				trace thrust					trace CMT			trace RT																trace Dadeldhura thrust
LH-SH total structural elevation		5.5	5.5	5.5	6	6	7.5	7.5	7.5	7.5	7.5	7.5	7	5.5	4.5	8	8.5	6	10	8	7.5	11	10.5	10.5	20.5	19.5	17.5	17	17	18	19.5	20	20	20	20	20	20	20	19.5	18.5	17	16	16	16	16	16	16.5	16.5	16.5
Reference contact used for total structural elevation		top Siw	top Siw	top Siw	top Siw	mid Siw	mid Siw	mid Siw	mid Siw	mid Siw	mid Siw	base Siw	base Siw	base Siw	base Siw	mid Siw	mid Siw	base Siw	base Siw	base Siw	base Siw	base Lakharpata	base Dumri	base Dumri	top Ranimata	top Ranimata	top Ranimata	top Ranimata	top Ranimata	top Ranimata	top Ranimata	top Ranimata	top Ranimata	top Ranimata	top Ranimata	top Ranimata	top Ranimata	top Ranimata	top Ranimata	top Ranimata	top Ranimata	top Ranimata	top Ranimata	top Ranimata	top Ranimata	top Ranimata	top Ranimata	top Ranimata	top Ranimata
LH-SH preserved structural elevation						6	6	5	3.5	2.5	2	1	7	6	5	4	8	6.5	5.5	8	7.5	11	10.5	11	18.5	17	17	16.5	17	17.5	18.5	19.5	20	20	20	20	20	20	19.5	18.5	17	16	16	16	16	16	16.5	16.5	16.5
16 - Chainpur, Western Nepal (Robinson et al., 2006)
Surface elevation			0.5	0.5	0.5	0.5	1	1	1	0.5	0.5	0.5	1	1.5	1.5	1	0.5	1	1.5	1	1.5	1	0.5	0.5	1	1	1	1	1.5	1	2	1.5	2	2	2	2	2.5	2.5	2	2.5	3	2	2	2.5	3	2.5	2.5	2	2
Depth to basal décollement			-3.5	-2.5	-1.5	0	2.5	4	5.5	6.5	7.5	7.5	8.5	9	9.5	9	8.5	9	9.5	9	9.5	9.5	9	9.5	9.5	10	10	10	10.5	10.5	11.5	11.5	11.5	12.5	13.5	15.5	17	18	18	18.5	19	18	18	19	19.5	19.5	19.5	19	19
Trace locations of major structures						trace MFT						trace thrust			trace MBT		trace normal fault		trace thrust	trace RT								trace MCT														trace MCT	trace RT
LH-SH full structural elevation			4.5	6	7.5	8	7.5	6	4.5	7.5	7.5	7	5	11	13	12.5	9	12	12.5	15	16.5	16.5	16	16.5	15.5	17	16.5	15.5	14.5	11.5	11.5	11.5	11.5	13	14.5	15	15	14.5	15	15.5	15.5	17	22	22	22	24.5	25.5	24	26
Reference contact used for total structural elevation			mid Siw	mid Siw	mid Siw	mid Siw	mid Siw	mid Siw	mid Siw	mid Siw	mid Siw	mid Siw	mid Siw	top Dumri	top Dumri	top Syangia	top Syangia	top Dumri	top Dumri	top Kushma	top Kushma	top Kushma	top Kushma	top Kushma	top Kushma	top Kushma	top Kushma	top Kushma	top Kushma	top Ranimata	top Ranimata	top Ranimata	top Ranimata	top Ranimata	top Ranimata	top Ranimata	top Ranimata	top Ranimata	top Ranimata	top Ranimata	top Ranimata	top Ranimata	top Ranimata	top Ranimata	top Ranimata	top Ranimata	top Ranimata	top Ranimata	top Ranimata
LH-SH preserved structural elevation						7.5	6.5	4	3.5	2.5	1	6.5	5.5	4.5	10	11.5	8.5	9	12	15	15.5	16.5	16	16.5	15.5	17	16.5	15.5	14.5	11.5	11.5	11.5	11.5	13	14.5	15	15	14.5	15	15.5	15.5	17	13	14.5	14.5	15	15.5	20.5	20.5
17 - Api, Wesetern Nepal (Robinson et al., 2006)
Surface elevation			0.5	0.5	0.5	0.5	0.5	0.5	1	1.5	1.5	0.5	1.5	1	1	1	1	1	1	1.5	1.5	2	2	2	2.5	2	1.5	1.5	1	1	0.5	1	1	1	1	1	1.5	2	2	2.5	2	2	2.5	2.5	2.5	2	2.5	2	2.5
Depth to basal décollement			-1	-0.5	-0.5	0	0.5	0.5	2	3.5	4.5	5	7	8	8	8	8.5	8.5	8.5	9	9	9.5	10	10	10.5	10	10	10	10	10	9.5	10	10.5	10.5	10.5	11	11.5	11.5	12	12.5	12.5	13	15	16.5	18	18	18.5	18.5	19
Trace locations of major structures						trace MFT								trace thrust		trace MBT	trace RT		trace DT/MCT								trace STDS (?)							trace DT/MCT	trace RT
LH-SH total structural elevation			3	4	5.5	6.5	7	7	5.5	4.5	4	8	8	11	12.5	10.5	14	14	13.5	12	11	9.5	9.5	10.5	11	11.5	11.5	11.5	11.5	11.5	11.5	11.5	12.5	22	22.5	21.5	22	21	21	21	20.5	19	18	19	20.5	20.5	19.5	19	21
Reference contact used for total structural elevation			mid Siw	mid Siw	mid Siw	mid Siw	mid Siw	mid Siw	mid Siw	mid Siw	mid Siw	mid Siw	mid Siw	mid Siw	base Syangia	base Syangia	top Ranimata	top Ranimata	top Ranimata	top Ranimata	top Ranimata	top Ranimata	top Ranimata	top Ranimata	top Ranimata	top Ranimata	top Ranimata	top Ranimata	top Ranimata	top Ranimata	top Ranimata	top Ranimata	top Ranimata	top Ranimata	top Ranimata	top Ranimata	top Ranimata	top Ranimata	top Ranimata	top Ranimata	top Ranimata	top Ranimata	top Ranimata	top Ranimata	top Ranimata	top Ranimata	top Ranimata	top Ranimata	top Ranimata
LH-SH preserved structural elevation						5.5	7	6.5	5.5	4.5	4	3	2.5	7.5	7.5	12	14.5	14.5	13.5	12	11	9.5	9.5	10.5	11	11.5	11.5	11.5	11.5	11.5	11.5	11.5	12.5	16	10.5	10	11	11	14.5	14.5	13.5	19	18	19	14	14	19.5	19	20.5
18 - Eastern Kumaun (Mandal et al., 2019)
Surface elevation			0	0	0	0.5	0.5	0.5	0.5	1	1	1	1	1	1	1	1	1.5	2	2	2	1.5	2	2	2	1.5	1.5	1	0.5	1.5	2	2.5	2.5	2	2	2	2	2	2	2	1.5	1.5	1.5	2	2	2	1.5	1.5	2
Depth to basal décollement			-2.5	-2	-1	0	2.5	5	7.5	8	8.5	8.5	8	8.5	8.5	9	9	9.5	10	10.5	10	10	10	10.5	10.5	10	10.5	10	9.5	10.5	11.5	12	12	11.5	11.5	12.5	14	15	16	17	17.5	19	20	21	22	23	23	23	23
Trace locations of major structures						trace MFT			trace thrust	trace thrust		trace MBT			trace RMT			trace MCT											trace MCT	trace RMT													trace RMT
LH-SH total structural elevation			3	4	5	6	8.5	8.5	17	17	12	11.5	12.5	20.5	19.5	19.5	19	18	17	17	16.5	16.5	16.5	16.5	16.5	16.5	16.5	16	25	24	25	23	25	26	26.5	26	26	26	26.5	26.5	26	26	25	25.5	24.5	23	22.5	23.5	26.5
Reference contact used for total structural elevation			mid Siw	mid Siw	mid Siw	mid Siw	mid Siw	mid Siw	top Chandpur	top Chandpur	top Chandpur	top Chandpur	top Chandpur	top Ramgarh-Berinag-Munsiari	top Ramgarh-Berinag-Munsiari	top Ramgarh-Berinag-Munsiari	top Ramgarh-Berinag-Munsiari	top Ramgarh-Berinag-Munsiari	top Ramgarh-Berinag-Munsiari	top Ramgarh-Berinag-Munsiari	top Ramgarh-Berinag-Munsiari	top Ramgarh-Berinag-Munsiari	top Ramgarh-Berinag-Munsiari	top Ramgarh-Berinag-Munsiari	top Ramgarh-Berinag-Munsiari	top Ramgarh-Berinag-Munsiari	top Ramgarh-Berinag-Munsiari	top Ramgarh-Berinag-Munsiari	top Ramgarh-Berinag-Munsiari	top Ramgarh-Berinag-Munsiari	top Ramgarh-Berinag-Munsiari	top Ramgarh-Berinag-Munsiari	top Ramgarh-Berinag-Munsiari	top Ramgarh-Berinag-Munsiari	top Ramgarh-Berinag-Munsiari	top Ramgarh-Berinag-Munsiari	top Ramgarh-Berinag-Munsiari	top Ramgarh-Berinag-Munsiari	top Ramgarh-Berinag-Munsiari	top Ramgarh-Berinag-Munsiari	top Ramgarh-Berinag-Munsiari	top Ramgarh-Berinag-Munsiari	top Ramgarh-Berinag-Munsiari	top Ramgarh-Berinag-Munsiari	top Ramgarh-Berinag-Munsiari	top Ramgarh-Berinag-Munsiari	top Ramgarh-Berinag-Munsiari	top Ramgarh-Berinag-Munsiari	top Ramgarh-Berinag-Munsiari
LH-SH preserved structural elevation						6	5.5	4	2.5	7	6	17.5	11.5	12	19.5	19.5	19	18	17	17	16.5	16.5	16.5	16.5	16.5	16.5	16.5	16	20	19	17.5	19	18	19	19	17.5	19	19	19	19	18.5	18.5	25	25.5	24.5	22.5	22.5	23	25
19 - Almora, Kumaon and Garwhal (Srivastava and Mitra, 1994)
Surface elevation				0	0	0	0.5	0.5	0.5	1	1	1	1.51	1.5	2	2	1	1	0.5	0.5	1	1	1	1	1.5	1.5	1.5	1.5	1.5	1.5	1.5	1.5	1.5	1.5	1.5	2	2	1.5	1.5	1	1.5	1.5	1.5	1	1	1	1.5	1.5	1.5
Depth to basal décollement				-4	-2	0	0.5	2.5	3	5.5	6.5	7.5	8.5	9.5	10	10	9.5	9	9	9	9.5	9.5	9.5	10	10	10.5	11	11.5	12	13	14.5	16	17.5	19	20	20.5	20.5	20.5	20.5	20.5	20.5	21	21	20.5	20.5	20.5	21	21	21.5
Trace locations of major structures						trace MFT					trace thrust	trace MBT					trace Ramgarh thrust						trace Munsiari thrust												trace Munsiari thrust						trace Munsiari thrust	trace Munsiari thrust
LH-SH total structural elevation				5.5	5.5	5.5	5	5.5	7	12	11.5	11	12	14	15	15	23.5	22	22	21.5	21	20.5	23	22	21.5	21	21	20.5	20.5	20.5	21	22	23	25	26.5	28	28	26.5	26	26	25.5	36	28.5	30	29.5	28.5	28	27.5	27.5
Reference contact used for total structural elevation				mid Siw	mid Siw	mid Siw	mid Siw	mid Siw	upper Siw	top Subathu	top Subathu	top Subathu	top Subathu	top Subathu	top Subathu	top Subathu	base Almora Gp	base Almora Gp	base Almora Gp	base Almora Gp	base Almora Gp	base Almora Gp	base Almora Gp	base Almora Gp	base Almora Gp	base Almora Gp	base Almora Gp	base Almora Gp	base Almora Gp	base Almora Gp	base Almora Gp	base Almora Gp	base Almora Gp	base Almora Gp	base Almora Gp	base Almora Gp	base Almora Gp	base Almora Gp	base Almora Gp	base Almora Gp	base Almora Gp	base Almora Gp	base Almora Gp	base Almora Gp	base Almora Gp	base Almora Gp	base Almora Gp	base Almora Gp	base Almora Gp
LH-SH preserved structural elevation						5	5	5.5	6	5	6.5	11	10.5	12	12.5	14	23.5	22	22	21.5	21	20.5	22.5	22	21.5	21	21	20.5	20	20	21	22	22.5	25	17	17	15.5	14.5	14.5	14.5	25.5	15	17	18	17.5	16	15	14.5	15
20 - Deoprayag, Kumaon and Garwhal (Srivastava and Mitra, 1994)
Surface elevation				0.5	0.5	0.5	0.5	0.5	0.5	1	1	1.5	1	1	0.5	1	0.5	0.5	1	1	1.5	1	1.5	1.5	1	0.5	1.5	1.5	1.5	1.5	1	1.5	1	1.5	1.5	2	2	1.5	1.5	2	1.5	2	2.5	3	3	3	3	3	3
Depth to basal décollement				-3.5	-2	0	0.5	1	3	4.5	6.5	8	8	8	8	8.5	8	8	8.5	8.5	9	9	9.5	9.5	9	9	9.5	9.5	10	10	9.5	10	10	10.5	10.5	11	11.5	13	15	17	17.5	18.5	19	19.5	19.5	20	20	20	20
Trace locations of major structures						trace MFT				trace thrust	trace thrust	trace MBT	trace Ramgarh thrust		trace Munsiari thrust		trace Munsiari thrust					trace Ramgarh thrust	trace thrust													trace thrust		trace normal fault				trace Ramgarh thrust						trace Munsiari thrust
LH-SH total structural elevation				5	5.5	6	6	6	7	6	8	10	16	15	22	21.5	22	23	23.5	24	26	28	29	29.5	29	28.5	28	27.5	27.5	27	28	28	27.5	28	30	31	30.5	29	28	28.5	28.5	28.5	28.5	28	28	27.5	27	26.5	26
Reference contact used for total structural elevation				upper Siw	upper Siw	upper Siw	mid Siw	mid Siw	upper Siw	mid Siw	base Siw	top Kr+Ta	base Rg	base Rg	base Almora Gp	base Almora Gp	base Almora Gp	base Almora Gp	base Almora Gp	base Almora Gp	base Almora Gp	base Almora Gp	base Almora Gp	base Almora Gp	base Almora Gp	base Almora Gp	base Almora Gp	base Almora Gp	base Almora Gp	base Almora Gp	base Almora Gp	base Almora Gp	base Almora Gp	base Almora Gp	base Almora Gp	base Almora Gp	base Almora Gp	base Almora Gp	base Almora Gp	base Almora Gp	base Almora Gp	base Almora Gp	base Almora Gp	base Almora Gp	base Almora Gp	base Almora Gp	base Almora Gp	base Almora Gp	base Almora Gp
LH-SH preserved structural elevation						6	6	6	5.5	6	8	9.5	16	15	21.5	21.5	14.5	15	15	15.5	16	10	14.5	15	14.5	13.5	13.5	13.5	13.5	13.5	13.5	13.5	13.5	14	14.5	17	15.5	13	13	13	13	18.5	18.5	19	18.5	17.5	17.5	26	25.5
21 - Himachal Pradesh (Webb, 2013)
Surface elevation					0.5	0.5	0.5	0.5	0.5	0.5	0.5	0.5	1	1	1	1	1.5	1.5	1.5	1.5	1.5	2	1.5	1	1.5	1.5	2	2	2	1.5	2	2	2	2	2	2	2	2	2	2	2	2	2	2	2	2.5	2.5	2.5	2.5
Depth to basal décollement					-1.5	0	1	2	3	4.5	4.5	4.5	5	5	5.5	5.5	6	6	6.5	6.5	6.5	7	7	7	7.5	8	8.5	8.5	8.5	9	9	9.5	10	10	10.5	10.5	10.5	10.5	11	11.5	11.5	11.5	12	12	12	12.5	13	13.5	13.5
Trace locations of major structures						trace MFT					trace thrust		trace thrust		trace thrust	trace thrust			trace thrust	start outer LH						trace STDS																					trace STDS
LH-SH full structural elevation					1.5	1.5	1.5	1.5	14	11.5	9	13	14.5	12	10	14.5	11	10	9	11	9	9	8.5	11	10	8.5	8	8	8.5	9.5	9	9	10.5	12.5	13	13.5	13	13	13	12.5	12	11.5	11	11	10.5	10.5	9.5	8.5	8.5
Reference contact used for total structural elevation					top Siw	mid Siw	mid Siw	lower Siw	lower Siw	lower Siw	lower Siw	lower Siw	lower Siw	lower Siw	lower Siw	lower Siw	lower Siw	lower Siw	lower Siw	base Siw	base Siw	base Siw	base Siw	base Siw	base Siw	top Y-Z	top Y-Z	top Y-Z	top Y-Z	top Y-Z	top Y-Z	top Y-Z	top Y-Z	top Y-Z	top Y-Z	top Y-Z	top Y-Z	top Y-Z	top Y-Z	top Y-Z	top Y-Z	top Y-Z	top Y-Z	top Y-Z	top Y-Z	top Y-Z	top Y-Z	top Y-Z	top Y-Z
LH-SH preserved structural elevation						1.5	1.5	1.5	1.5	1	4.5	4	6.5	6	7	7.5	7.5	7.5	7.5	7	8	8.5	8	7.5	8	8.5	8	8	8.5	8.5	8.5	9	9	8.5	9	8.5	8.5	8.5	9	9	9	8.5	8.5	9	8.5	9.5	9.5	8.5	8.5
22 - Eastern Kashmir (Gaviollot et al., 2018)	*Southern end of Suruin-Mastgarh anticline used for '0' reference point for deformation front, as no emergent MFT is exposed
Surface elevation						0.5	0	0	0	0.5	0.5	0.5	0	0	0.5	1	0.5	0	0	0	0.5	1	1.5	2	2	2.5	2	2	1.5	1	1.5	2.5	2	2.5	2	2	2	1	1.5	1	1	1.5	1.5	1	1.5	1.5	2	1	1.5
Depth to basal décollement						6.5	6.5	6.5	6.5	6.5	7	7	7.5	8	8.5	9	9	9	9	9	9.5	10	10.5	11	11.5	12	12	11.5	11	11	12	12.5	12.5	13	12.5	12.5	12.5	12	12	12	12.5	13	13	12.5	13	13.5	13.5	13	13.5
Trace locations of major structures						S edge Suruin-Mastgarh anticline							trace thrust			trace MKT					trace TT												trace MBT		trace thrust		trace MCT		trace intra-HHC thrust
LH-SH total structural elevation						0	0.5	1.5	2	3	5.5	10	7.5	11.5	10.5	9	6.5	6	5	9	9.5	10	10	10	9.5	10	9.5	9	8	8.5	9.5	10.5	20	18	20	18	15	13	11.5	10	9	7.5	6.5	6.5	7	7	7	7	7
Reference contact used for total structural elevation						Mid Siw	Mid Siw	Mid Siw	Mid Siw	Mid Siw	Mid Siw	Mid Siw	Mid Siw	Mid Siw	Mid Siw	Mid Siw	Mid Siw	Mid Siw	Mid Siw	Mid Siw	Mid Siw	Mid Siw	top lower Muree	top lower Muree	top lower Muree	top lower Muree	top lower Muree	top lower Muree	top lower Muree	top lower Muree	top lower Muree	top lower Muree	top LH unit	top LH unit	top LH unit	top LH unit	top LH unit	top LH unit	top LH unit	top LH unit	top LH unit	top LH unit	top LH unit	top LH unit	top LH unit	top LH unit	top LH unit	top LH unit	top LH unit
LH-SH preserved structural elevation						0	0.5	1.5	2	3	5	6.5	5	3.5	2.5	7	6	5.5	5	4.5	8	8	9.5	10	9.5	10.5	9.5	9	8	8.5	9.5	10.5	18.5	17	18.5	17	15	13	11.5	10	9	7.5	6.5	6.5	7	7	7	7	7
[truncated: 56 more columns]

## Sheet: G48967
Long, S.P., and Robinson, D.M., 2021, Construction of the Lesser Himalayan–Subhimalayan thrust belt: The primary driver of thickening, exhumation, and high elevations in the Himalayan orogen since the middle Miocene: Geology, v. 49, https://doi.org/10.1130/G48967.1
